# Supplementary material for: Differential Expression of miRNAs in Colorectal Cancer: Comparison of Paired Tumor Tissue and Adjacent Normal Mucosa Using High-Throughput Sequencing
Source: PubMed Central journal article supplement (PMC3328481; doi:10.1371/journal.pone.0034150), 2012-04-17

# HTS vs qPCR

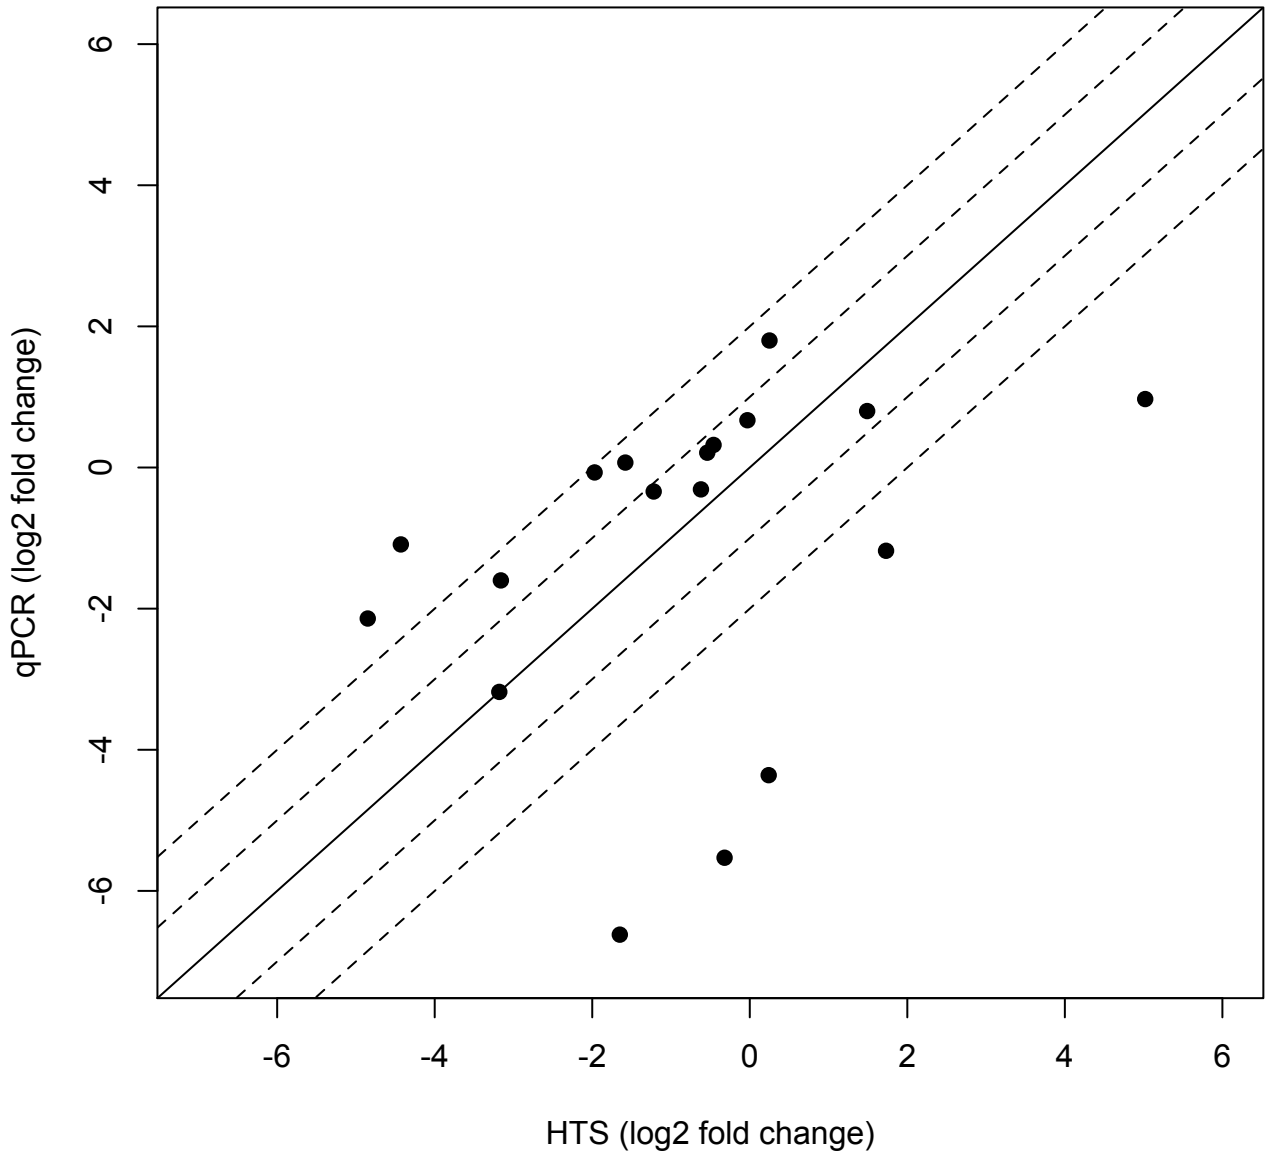

Supplement: pone.0034150.s001.pdf [file pone.0034150.s001.pdf]
