# Supplementary material for: Differential Expression of miRNAs in Colorectal Cancer: Comparison of Paired Tumor Tissue and Adjacent Normal Mucosa Using High-Throughput Sequencing
Source: PubMed Central journal article supplement (PMC3328481; doi:10.1371/journal.pone.0034150), 2012-04-17
Supplement: pone.0034150.s003.pdf [file pone.0034150.s003.pdf]

Supporting Information: Table S1

| miRNA            | Log2 Fold Change | FDR      |
|------------------|------------------|----------|
| hsa-miR-628-3p   | -7,21            | 7,01E-09 |
| hsa-miR-483-3p   | 4,59             | 7,41E-09 |
| hsa-miR-206      | 4,10             | 3,84E-08 |
| hsa-miR-1269     | 4,33             | 9,81E-08 |
| hsa-miR-187      | -3,97            | 2,14E-07 |
| hsa-miR-215      | -3,97            | 2,15E-07 |
| hsa-miR-1        | -2,13            | 2,70E-07 |
| hsa-miR-204      | 4,20             | 5,50E-07 |
| hsa-miR-135b     | 3,74             | 1,07E-05 |
| hsa-miR-3180-3p  | 3,57             | 1,91E-05 |
| hsa-miR-552      | 3,24             | 6,15E-05 |
| hsa-miR-7        | 3,33             | 6,37E-05 |
| hsa-miR-551b     | -4,07            | 1,20E-04 |
| hsa-miR-767-5p   | 3,36             | 1,48E-04 |
| hsa-miR-1275     | -3,52            | 2,11E-04 |
| hsa-miR-184      | -2,83            | 3,45E-04 |
| hsa-miR-3656     | -3,61            | 5,59E-04 |
| hsa-miR-96       | 2,87             | 1,52E-03 |
| hsa-miR-105      | 3,65             | 1,81E-03 |
| hsa-miR-549      | 5,73             | 1,84E-03 |
| hsa-miR-422a     | -3,02            | 2,32E-03 |
| hsa-miR-584      | 2,65             | 2,52E-03 |
| hsa-miR-592      | 3,08             | 2,63E-03 |
| hsa-miR-378      | -2,14            | 2,98E-03 |
| hsa-miR-378c     | -2,55            | 4,38E-03 |
| hsa-miR-490-3p   | -2,30            | 4,83E-03 |
| hsa-miR-139-5p   | -2,63            | 5,16E-03 |
| hsa-miR-1297     | -Inf             | 6,13E-03 |
| hsa-miR-3622a-5p | -2,62            | 6,38E-03 |
| hsa-miR-1827     | 3,45             | 9,36E-03 |
| hsa-miR-3151     | -3,77            | 9,36E-03 |
| hsa-miR-383      | -2,21            | 9,86E-03 |
| hsa-miR-145      | -2,19            | 1,05E-02 |
| hsa-miR-301b     | 2,87             | 1,08E-02 |
| hsa-miR-195      | -2,20            | 1,21E-02 |
| hsa-miR-3180-5p  | 2,69             | 1,21E-02 |
| hsa-miR-363      | -2,17            | 1,23E-02 |
| hsa-miR-24       | -1,18            | 1,63E-02 |
| hsa-let-7d       | -1,54            | 2,02E-02 |
| hsa-miR-628-5p   | -1,94            | 2,33E-02 |
| hsa-miR-1247     | 2,42             | 2,57E-02 |
| hsa-miR-493      | 2,57             | 2,73E-02 |
| hsa-miR-296-3p   | 2,18             | 4,62E-02 |
| hsa-miR-3914     | -2,51            | 4,66E-02 |
| hsa-miR-214      | -1,54            | 4,78E-02 |
| hsa-miR-4326     | 2,81             | 5,57E-02 |
| hsa-miR-483-5p   | 1,55             | 5,73E-02 |
| hsa-miR-486-5p   | -2,22            | 9,38E-02 |
| hsa-miR-3936     | -1,90            | 9,49E-02 |
| hsa-miR-3177     | 2,50             | 9,49E-02 |
| hsa-miR-3144-3p  | 2,58             | 9,49E-02 |
| hsa-miR-3163     | -2,85            | 9,65E-02 |
