# Supplementary material for: Differential Expression of miRNAs in Colorectal Cancer: Comparison of Paired Tumor Tissue and Adjacent Normal Mucosa Using High-Throughput Sequencing
Source: PubMed Central journal article supplement (PMC3328481; doi:10.1371/journal.pone.0034150), 2012-04-17
Supplement: pone.0034150.s004.pdf [file pone.0034150.s004.pdf]

Supporting Information: Table S2

| miRNA           | Log2 Fold Change | FDR      |
|-----------------|------------------|----------|
| hsa-miR-653     | 11,27            | 2,70E-20 |
| hsa-miR-7       | 9,01             | 4,11E-18 |
| hsa-miR-489     | 8,65             | 2,92E-15 |
| hsa-miR-1224-5p | 7,11             | 1,31E-12 |
| hsa-miR-1269    | 6,98             | 2,54E-12 |
| hsa-miR-137     | 7,08             | 4,67E-12 |
| hsa-miR-375     | 6,08             | 8,51E-12 |
| hsa-miR-615-3p  | 7,60             | 3,75E-11 |
| hsa-miR-153     | 6,19             | 2,24E-08 |
| hsa-miR-3065-3p | 5,79             | 2,67E-07 |
| hsa-miR-204     | 5,54             | 3,83E-07 |
| hsa-miR-129-3p  | 5,23             | 5,21E-07 |
| hsa-miR-615-5p  | 5,46             | 5,21E-07 |
| hsa-miR-330-5p  | 5,42             | 2,27E-06 |
| hsa-miR-1468    | 5,11             | 2,53E-06 |
| hsa-miR-129-5p  | 4,61             | 1,31E-05 |
| hsa-miR-1827    | 4,04             | 1,67E-04 |
| hsa-miR-3065-5p | 4,58             | 2,19E-04 |
| hsa-miR-196a    | 3,84             | 4,66E-04 |
| hsa-miR-96      | 3,96             | 5,06E-04 |
| hsa-miR-1179    | 3,97             | 2,04E-03 |
| hsa-miR-1224-3p | 6,41             | 3,03E-03 |
| hsa-miR-1301    | 3,48             | 5,60E-03 |
| hsa-miR-135a    | 3,54             | 8,12E-03 |
| hsa-miR-190b    | 3,82             | 9,05E-03 |
| hsa-miR-95      | 3,12             | 1,19E-02 |
| hsa-miR-744     | 3,10             | 1,63E-02 |
| hsa-miR-3200-3p | 3,56             | 2,43E-02 |
| hsa-miR-3177    | 4,27             | 2,67E-02 |
| hsa-miR-889     | 3,02             | 4,37E-02 |
| hsa-miR-1180    | 3,09             | 5,15E-02 |
| hsa-miR-668     | 4,34             | 5,67E-02 |
| hsa-miR-885-3p  | 3,03             | 5,67E-02 |
| hsa-miR-182     | 2,64             | 5,88E-02 |
| hsa-miR-330-3p  | 2,78             | 6,12E-02 |
| hsa-miR-488     | Inf              | 6,39E-02 |
| hsa-miR-3131    | 2,60             | 6,58E-02 |
| hsa-miR-651     | 2,92             | 9,24E-02 |
