# Supplementary material for: Differential Expression of miRNAs in Colorectal Cancer: Comparison of Paired Tumor Tissue and Adjacent Normal Mucosa Using High-Throughput Sequencing
Source: PubMed Central journal article supplement (PMC3328481; doi:10.1371/journal.pone.0034150), 2012-04-17
Supplement: pone.0034150.s005.pdf [file pone.0034150.s005.pdf]

Supporting Information: Table S3

| miRNA            | Log2 Fold Change | FDR       |
|------------------|------------------|-----------|
| hsa-miR-135b     | 4,24             | 2,09E-008 |
| hsa-miR-552      | 4,30             | 1,71E-007 |
| hsa-miR-1269     | 4,37             | 6,34E-007 |
| hsa-miR-7        | 3,50             | 6,93E-007 |
| hsa-miR-584      | 3,39             | 1,87E-006 |
| hsa-miR-96       | 3,22             | 1,87E-006 |
| hsa-miR-493      | 3,45             | 4,17E-006 |
| hsa-miR-592      | 3,77             | 7,04E-006 |
| hsa-miR-549      | 5,81             | 8,61E-006 |
| hsa-miR-483-3p   | 3,56             | 5,11E-005 |
| hsa-miR-1827     | 3,00             | 3,33E-004 |
| hsa-miR-628-3p   | -6,17            | 4,07E-004 |
| hsa-miR-551b     | -3,65            | 4,37E-004 |
| hsa-miR-139-5p   | -2,66            | 5,56E-004 |
| hsa-miR-542-3p   | 2,28             | 1,49E-003 |
| hsa-miR-224      | 2,35             | 1,69E-003 |
| hsa-miR-203      | 2,69             | 2,16E-003 |
| hsa-miR-889      | 2,27             | 2,16E-003 |
| hsa-miR-195      | -2,31            | 2,16E-003 |
| hsa-miR-422a     | -2,38            | 2,16E-003 |
| hsa-miR-134      | 2,09             | 3,32E-003 |
| hsa-miR-31       | 2,21             | 3,34E-003 |
| hsa-miR-146b-5p  | 2,06             | 4,86E-003 |
| hsa-miR-1295     | 3,21             | 5,12E-003 |
| hsa-miR-124      | -2,32            | 7,12E-003 |
| hsa-miR-146a     | 2,19             | 8,23E-003 |
| hsa-miR-651      | 2,31             | 8,47E-003 |
| hsa-miR-1        | -2,04            | 8,98E-003 |
| hsa-miR-95       | 1,98             | 9,47E-003 |
| hsa-miR-146b-3p  | 1,96             | 1,08E-002 |
| hsa-miR-3177     | 3,18             | 1,37E-002 |
| hsa-miR-3151     | -3,11            | 1,63E-002 |
| hsa-miR-496      | 2,17             | 1,63E-002 |
| hsa-let-7i       | 1,80             | 1,72E-002 |
| hsa-miR-200a     | 2,19             | 1,72E-002 |
| hsa-miR-3168     | 1,88             | 1,84E-002 |
| hsa-miR-382      | 1,77             | 1,87E-002 |
| hsa-miR-3656     | -2,29            | 1,92E-002 |
| hsa-miR-675      | 2,25             | 2,09E-002 |
| hsa-miR-19a      | 2,01             | 2,26E-002 |
| hsa-miR-378c     | -1,86            | 2,26E-002 |
| hsa-miR-450a     | 1,81             | 2,33E-002 |
| hsa-miR-155      | 1,79             | 2,41E-002 |
| hsa-miR-3117     | 1,97             | 2,61E-002 |
| hsa-miR-145      | -1,72            | 2,63E-002 |
| hsa-miR-429      | 2,07             | 2,83E-002 |
| hsa-miR-3622a-5p | -1,99            | 2,85E-002 |
| hsa-miR-363      | -1,86            | 2,91E-002 |
| hsa-miR-1297     | -6,81            | 2,91E-002 |
| hsa-miR-3162     | 2,54             | 2,93E-002 |
| hsa-miR-409-5p   | 1,71             | 3,18E-002 |

Supporting Information: Table S3

|                 |       |           |
|-----------------|-------|-----------|
| hsa-miR-3662    | 4,27  | 3,30E-002 |
| hsa-miR-1246    | 1,81  | 3,37E-002 |
| hsa-miR-296-3p  | 1,86  | 3,51E-002 |
| hsa-miR-589     | 1,67  | 3,61E-002 |
| hsa-miR-127-5p  | 1,66  | 3,63E-002 |
| hsa-miR-378     | -1,69 | 3,63E-002 |
| hsa-miR-508-3p  | 2,42  | 3,72E-002 |
| hsa-miR-762     | 6,99  | 3,92E-002 |
| hsa-miR-628-5p  | -1,66 | 3,99E-002 |
| hsa-miR-194     | 1,86  | 4,04E-002 |
| hsa-miR-486-5p  | -2,12 | 4,69E-002 |
| hsa-miR-769-5p  | 1,58  | 4,77E-002 |
| hsa-miR-200b    | 1,97  | 4,77E-002 |
| hsa-miR-3180-3p | 2,60  | 4,77E-002 |
| hsa-miR-345     | 1,57  | 4,77E-002 |
| hsa-miR-92a     | 1,56  | 4,77E-002 |
| hsa-miR-3144-3p | 2,82  | 4,77E-002 |
| hsa-miR-3163    | -2,14 | 4,89E-002 |
| hsa-miR-654-5p  | 1,80  | 4,89E-002 |
| hsa-miR-21      | 1,49  | 4,97E-002 |
| hsa-miR-449a    | 2,35  | 5,00E-002 |
| hsa-miR-1247    | 1,89  | 5,28E-002 |
| hsa-miR-20b     | -1,86 | 5,76E-002 |
| hsa-miR-330-5p  | 1,72  | 6,03E-002 |
| hsa-miR-34a     | 1,49  | 6,42E-002 |
| hsa-miR-3652    | 2,03  | 6,47E-002 |
| hsa-miR-3620    | 3,69  | 6,47E-002 |
| hsa-miR-490-3p  | -1,79 | 6,54E-002 |
| hsa-miR-144     | -2,02 | 6,54E-002 |
| hsa-miR-1301    | 1,47  | 6,72E-002 |
| hsa-miR-744     | 1,40  | 6,80E-002 |
| hsa-miR-370     | 1,55  | 6,84E-002 |
| hsa-miR-423-5p  | 1,48  | 6,96E-002 |
| hsa-miR-1254    | 1,64  | 6,96E-002 |
| hsa-miR-1292    | 1,67  | 7,14E-002 |
| hsa-miR-409-3p  | 1,45  | 7,29E-002 |
| hsa-miR-19b     | 1,66  | 7,29E-002 |
| hsa-miR-383     | -1,67 | 7,29E-002 |
| hsa-miR-105     | 3,97  | 7,49E-002 |
| hsa-miR-653     | 2,81  | 7,49E-002 |
| hsa-miR-720     | 1,51  | 7,50E-002 |
| hsa-miR-548o    | 1,69  | 7,50E-002 |
| hsa-miR-622     | 6,54  | 7,55E-002 |
| hsa-miR-3171    | 6,28  | 7,58E-002 |
| hsa-miR-129-3p  | -1,55 | 7,65E-002 |
| hsa-miR-29c     | -1,39 | 7,65E-002 |
| hsa-miR-3179    | -1,73 | 7,65E-002 |
| hsa-miR-3191    | 3,20  | 7,65E-002 |
| hsa-miR-3189    | 3,52  | 7,84E-002 |
| hsa-miR-671-5p  | 1,44  | 7,84E-002 |
| hsa-miR-9       | -1,51 | 7,99E-002 |
| hsa-miR-431     | 2,27  | 7,99E-002 |

**Supporting Information: Table S3**

|                 |       |           |
|-----------------|-------|-----------|
| hsa-miR-18a     | 1,42  | 8,35E-002 |
| hsa-miR-1265    | -2,83 | 8,35E-002 |
| hsa-miR-1286    | 2,19  | 8,35E-002 |
| hsa-miR-4326    | 2,52  | 8,35E-002 |
| hsa-miR-3126-5p | 2,02  | 8,35E-002 |
| hsa-miR-618     | 1,88  | 8,36E-002 |
| hsa-miR-23b     | -1,32 | 8,76E-002 |
| hsa-miR-497     | -1,35 | 8,76E-002 |
| hsa-miR-3121    | 1,82  | 8,81E-002 |
| hsa-miR-3944    | 6,75  | 8,81E-002 |
| hsa-miR-379     | 1,32  | 8,85E-002 |
| hsa-miR-98      | 1,32  | 8,85E-002 |
| hsa-miR-3131    | 1,73  | 8,85E-002 |
| hsa-miR-182     | 1,33  | 9,99E-002 |
| hsa-miR-3913    | 1,56  | 9,99E-002 |
